# Supplementary material for: Photoluminescence enhancement from silicon quantum dots located in the vicinity of a monolayer of gold nanoparticles
Source: Royal Society of Chemistry journal article supplement (doi:10.1039/c5ra19114a), 2015-01-01
Supplement: c5ra19114a1.pdf [file c5ra19114a1.pdf]

## Supporting Figures

*OF*

### **Photoluminescence enhancement from silicon quantum dots located in the vicinity of a monolayer of gold nanoparticles**

*A.L. Muñoz-Rosas<sup>1</sup>, A. Rodríguez-Gómez<sup>2\*</sup>, J.A. Arenas-Alatorre<sup>2</sup>, J.C. Alonso-Huitrón<sup>1</sup>*

<sup>1</sup>Instituto de Investigaciones en Materiales, Universidad Nacional Autónoma de  
México, A.P.70-360, Coyoacán04510, México D. F., Mexico

<sup>2</sup>Instituto de Física, Universidad Nacional Autónoma de México, A.P.20-364,  
Coyoacán01000, México D. F., Mexico

**\*Corresponding Author**

E-mail: [arodriguez@fisica.unam.mx](mailto:arodriguez@fisica.unam.mx) (A. Rodríguez-Gómez)

Tel: +52 (1) 55-1370-9620

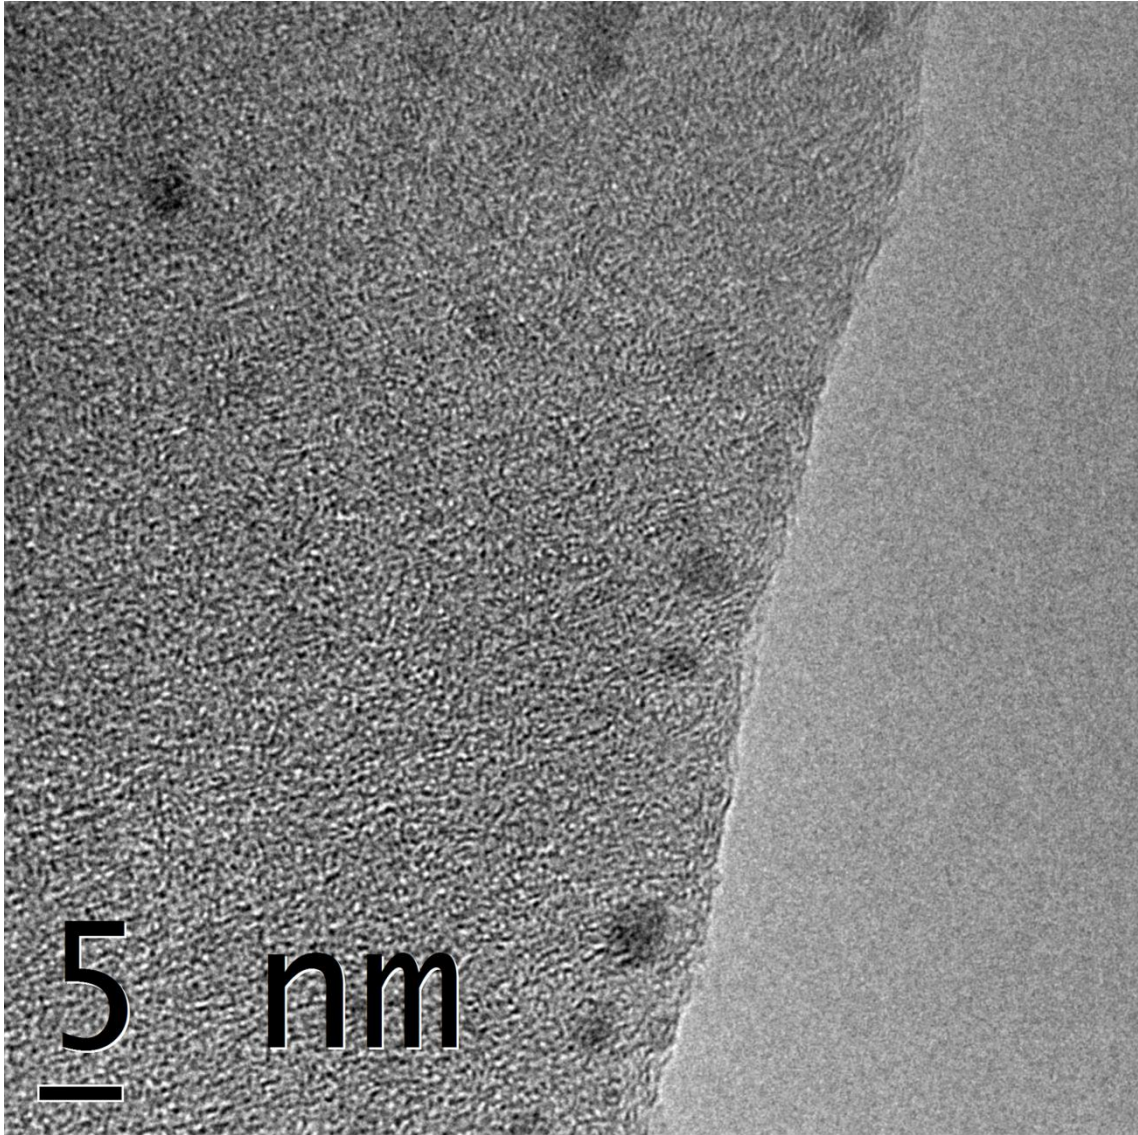

**Supporting Figure 1.** HRTEM micrograph obtained from a DIEL film. Amorphous and quasi-stoichiometric silicon nitride film is observed. First statistical count showed a particle density of about  $3.04E^4$  particles/cm<sup>2</sup>.

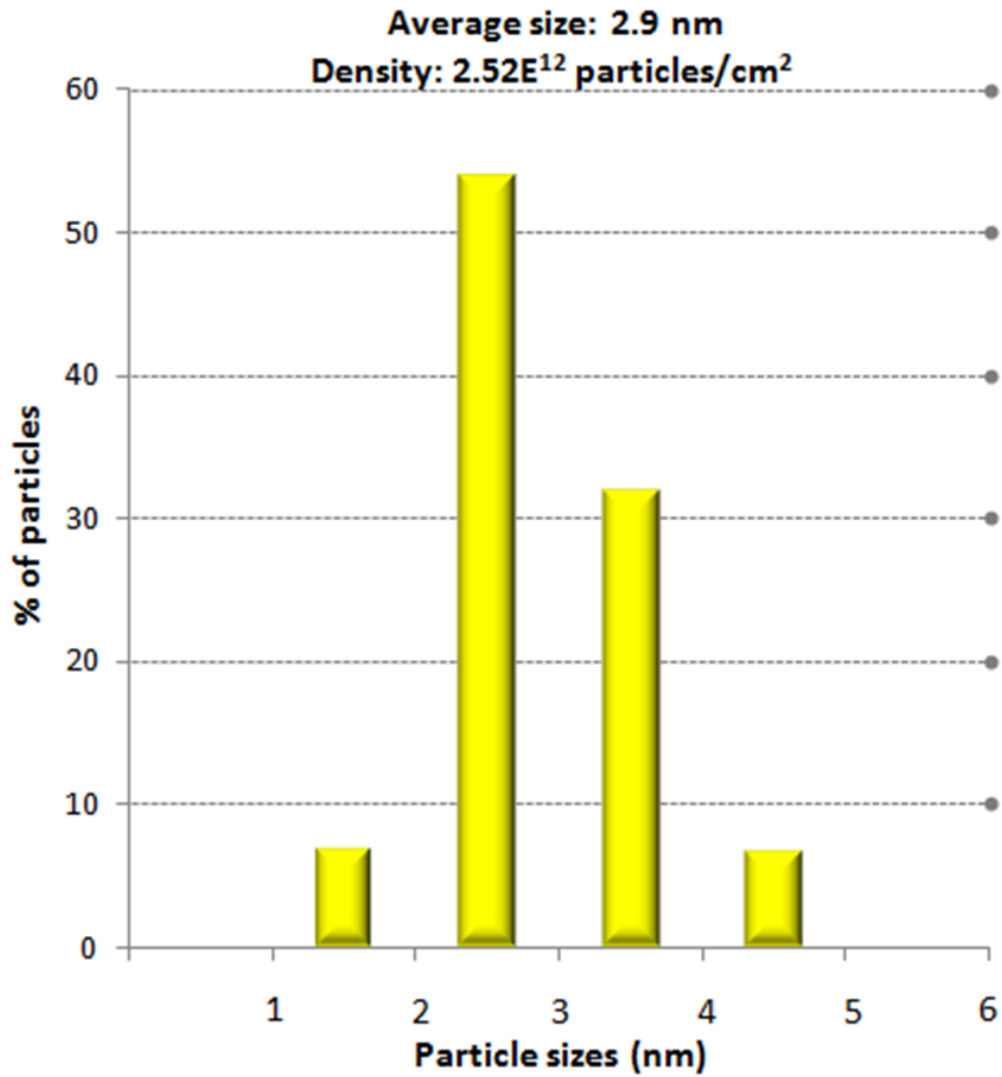

**Supporting Figure 2.** Histogram of sample 5, AuNPs deposited over silicon wafer.

This sample showed the highest ratio  $R_{Au} = 0.86$  corresponding to a superficial density of  $Au-\rho = 2.52E12$  particles/cm<sup>2</sup> and an average size of  $Au-\varnothing = 2.90$  nm.

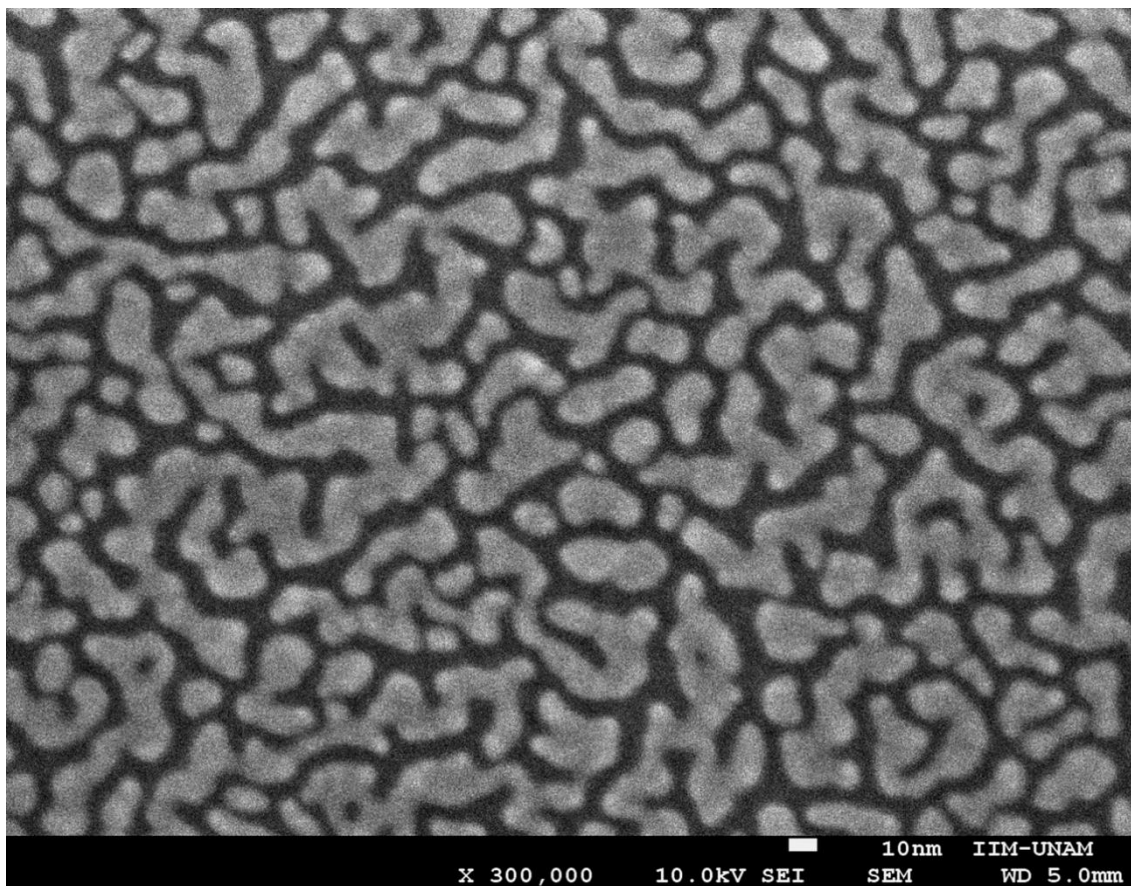

**Supporting Figure 3.** Field Emission SEM micrograph from a 20 seconds deposition of AuNPs. Here is observed a  $R_{Au}$  near zero. Additionally, it is possible to observe a totally new kind of particles with bigger sizes and irregular shapes.
